# Supplementary material for: Comparison of the Effects of High Hydrostatic Pressure and Pasteurization on Quality of Milk during Storage
Source: MDPI journal article supplement (doi:10.3390/foods11182837), 2022-09-14
Supplement: s1 [file s1]

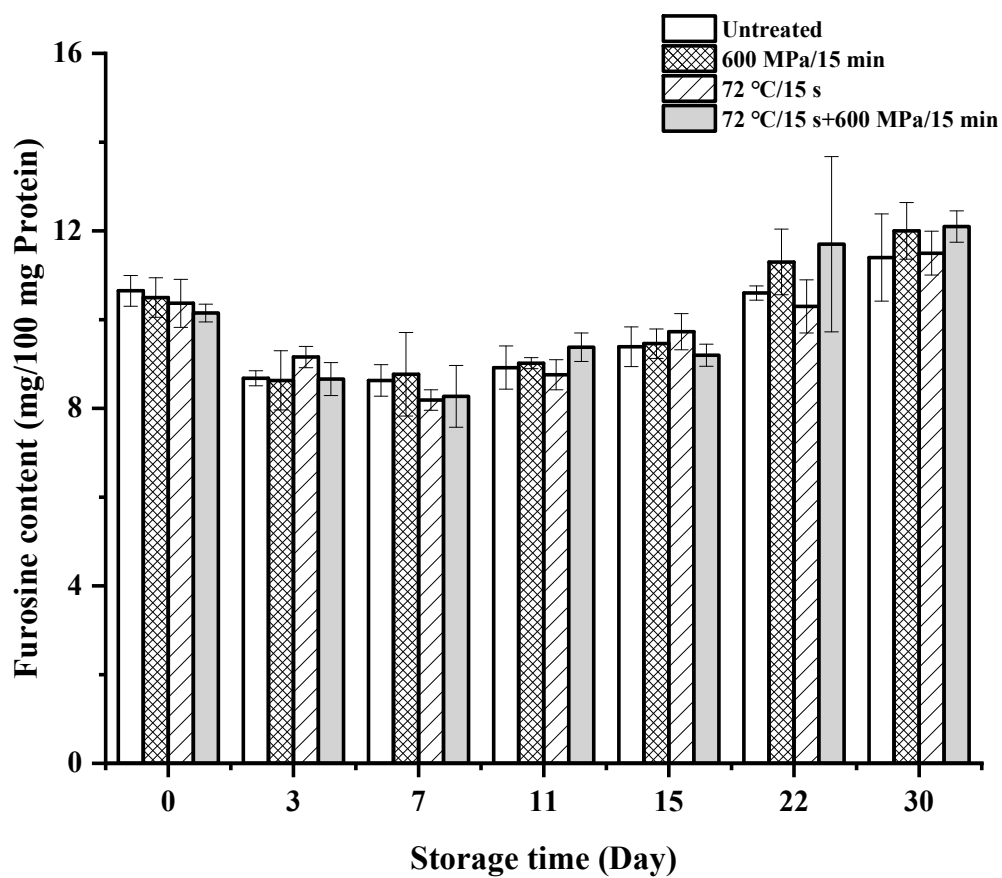

**Figure S1.** Changes in furosine content of milk processed with HHP (600 MPa/15 min), pasteurization (72°C/15 s) and pasteurization-HHP (72°C/15 s+600 MPa/15 min) during storage at 4°C.

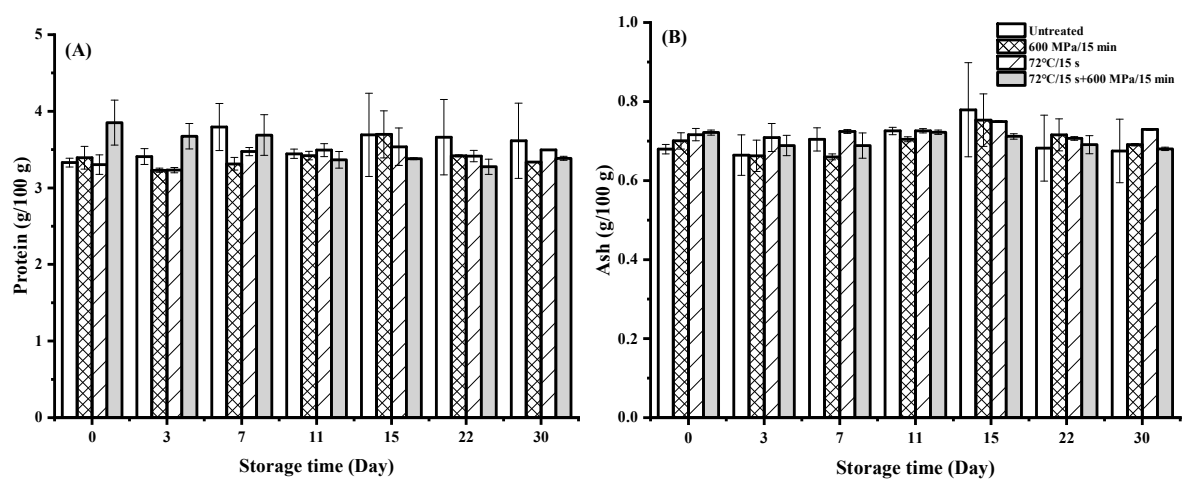

**Figure S2.** Changes in protein (A) and ash (B) content of milk processed with HHP (600 MPa/15 min), pasteurization (72°C/15 s) and pasteurization-HHP (72°C/15 s+600 MPa/15 min) during storage at 4°C.

**Table S1** Standard score sheet for the sensory evaluation of milk

| Indicators            | Standard                                           | Score |
|-----------------------|----------------------------------------------------|-------|
| Taste                 | Soft, delicate and sweet, with milky fragrance     | 30-40 |
|                       | Relatively delicate, slightly sweet with no mutton | 16-29 |
|                       | Heavy mutton                                       | 1-15  |
| Color                 | Milky white                                        | 16-20 |
|                       | Slightly yellow                                    | 11-15 |
|                       | Yellow                                             | 1-10  |
| Organizational status | Uniform with no fat floating                       | 16-20 |
|                       | Uniform with slight delamination                   | 11-15 |
|                       | Obvious stratification, precipitation and clot     | 1-10  |
| Flavor                | Strong and durable milky fragrance                 | 16-20 |
|                       | Light and unsustainable milky fragrance            | 11-15 |
|                       | No milk fragrance, heavy peculiar smell            | 1-10  |
